# Supplementary material for: Impact of the Implementation of the Deposit Refund System on Coastal Littering in Latvia
Source: Preprints.org preprint supplement (doi:10.20944/preprints202405.0708.v1), 2024-05-10
Supplement: Supplementary file 1 [file supplementary]

**Supplementary information**

**Hotspot Survey Sites Data Profiles and Survey Areas**

1. Užava


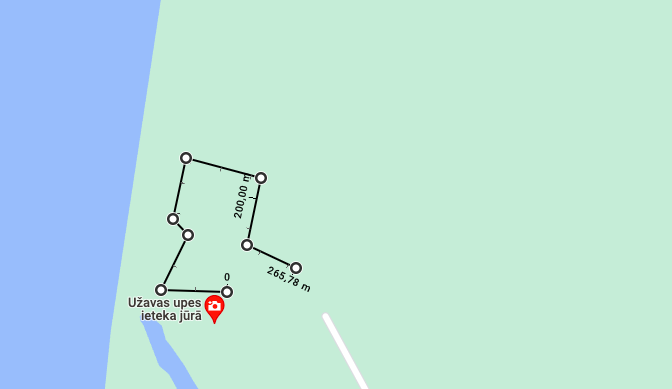


*Data 2021*

*Data 2022 / 2023*

2. Pavilosta


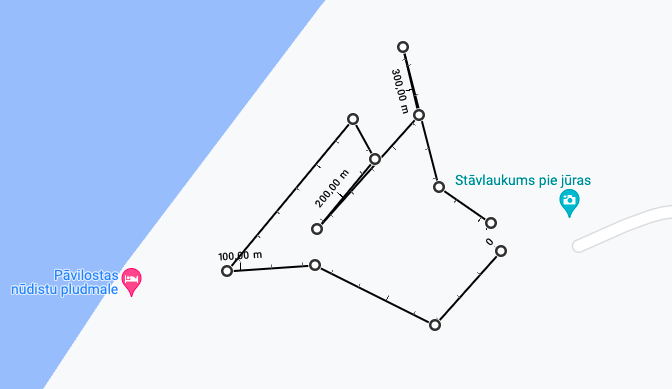


Data 2021

Data 2022 / 2023

|  | Pavilosta | | |
| --- | --- | --- | --- |
| Total 2021 | 5 | | |
| Total 2022 | 3 | | |
|  | DEP | NO | UN |
| Plastic | 0 | 0 | 0 |
| <0,5 |  |  |  |
| 0,5 |  |  |  |
| >0,5 |  |  |  |
| Glass | 0 | 1 | 0 |
| <0,5 |  |  |  |
| 0,5 |  |  |  |
| >0,5 |  | 1 |  |
| Alluminium | 2 | 0 | 0 |
| <0,5 | 2 |  |  |
| 0,5 |  |  |  |
| >0,5 |  |  |  |
| 2022 type | 2 | 1 | 0 |

3. Pape


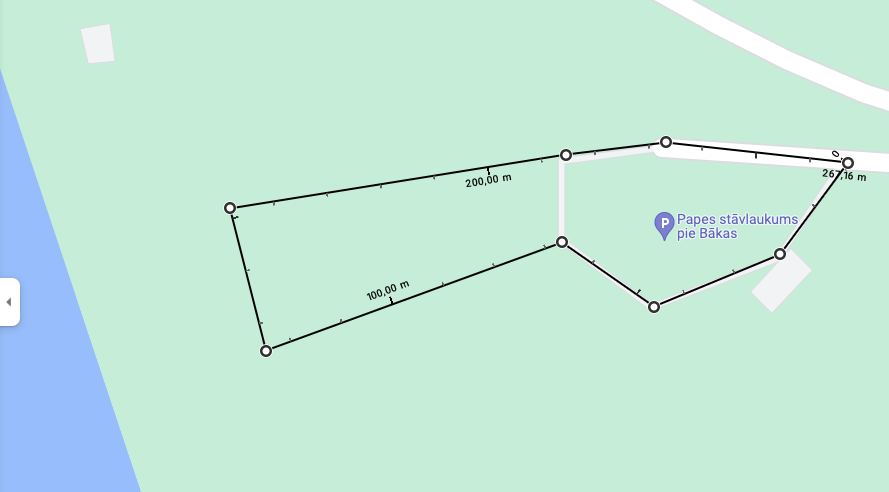


Data 2021

Data 2022 / 2023

4. Liepaja Karosta


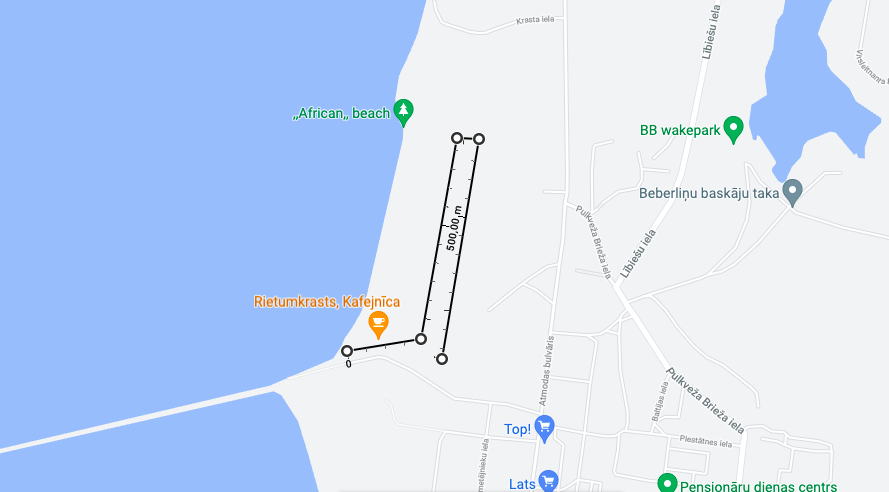


Data 2021

Data 2022 / 2023

5. Zvejniekciems


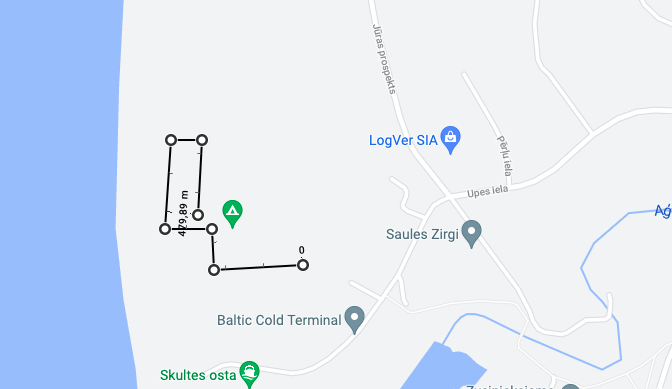


Data 2021

Data 2022 / 2023

6. Salacgriva


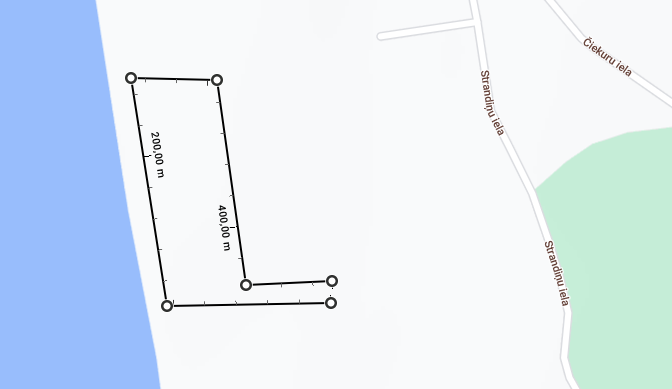


Data 2021

Data 2022 / 2023

7. Lilaste


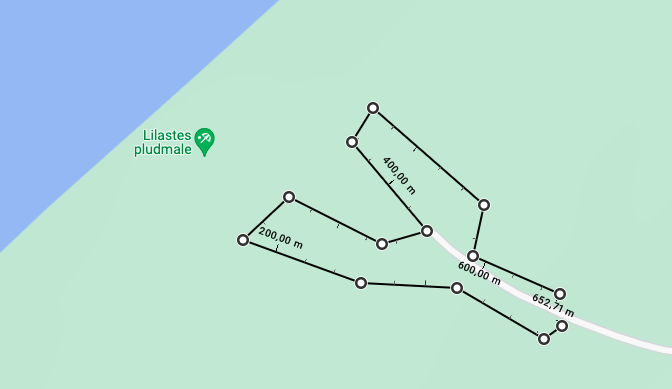


Data 2021

Data 2022 / 2023

|  | Lilaste | | |
| --- | --- | --- | --- |
| Total 2021 | 6 | | |
| Total 2022 | 2 | | |
|  | DEP | NO | UN |
| Plastic | 0 | 1 | 0 |
| <0,5 |  |  |  |
| 0,5 |  |  |  |
| >0,5 |  | 1 |  |
| Glass | 0 | 1 | 0 |
| <0,5 |  |  |  |
| 0,5 |  |  |  |
| >0,5 |  | 1 |  |
| Alluminium | 0 | 0 | 0 |
| <0,5 |  |  |  |
| 0,5 |  |  |  |
| >0,5 |  |  |  |
| 2022 type | 0 | 2 | 0 |

8. Daugavgriva


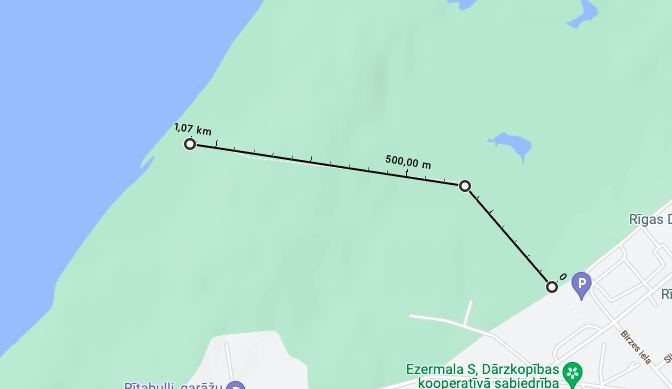


Data 2021

Data 2022 / 2023

|  | Daugavgriva | | |
| --- | --- | --- | --- |
| Total 2021 | 71 | | |
| Total 2022 | 36 | | |
|  | DEP | NO | UN |
| Plastic | 0 | 4 | 14 |
| <0,5 |  |  |  |
| 0,5 |  | 1 | 5 |
| >0,5 |  | 3 | 9 |
| Glass | 1 | 9 | 2 |
| <0,5 |  | 5 |  |
| 0,5 | 1 |  | 2 |
| >0,5 |  | 4 |  |
| Alluminium | 2 | 2 | 2 |
| <0,5 | 1 |  | 1 |
| 0,5 | 1 | 1 | 1 |
| >0,5 |  | 1 |  |
| 2022 type | 3 | 15 | 18 |

9. Vakarbulli


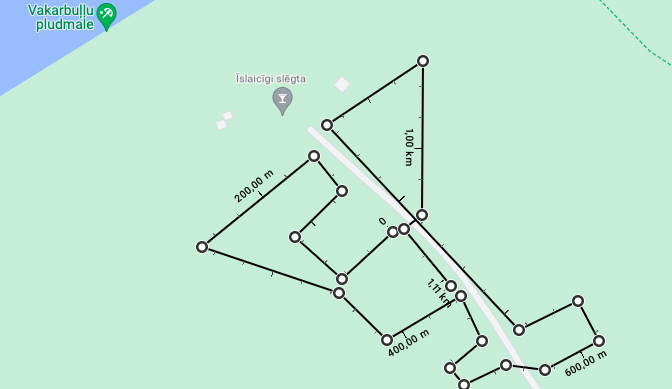


Data 2021

Data 2022 / 2023

10 Vitrupe 1


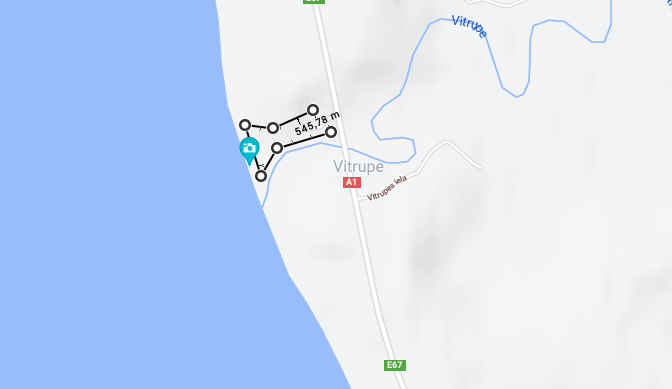


Data 2021

Data 2022 / 2023

|  | Vitrupe 1 | | |
| --- | --- | --- | --- |
| Total 2021 | 19 | | |
| Total 2022 | 22 | | |
|  | DEP | NO | UN |
| Plastic | 0 | 2 | 5 |
| <0,5 |  |  |  |
| 0,5 |  | 1 | 2 |
| >0,5 |  | 1 | 3 |
| Glass | 5 | 4 | 3 |
| <0,5 |  | 2 |  |
| 0,5 | 5 | 1 | 3 |
| >0,5 |  | 1 |  |
| Alluminium | 1 | 2 | 0 |
| <0,5 | 1 |  |  |
| 0,5 |  | 2 |  |
| >0,5 |  |  |  |
| 2022 type | 6 | 8 | 8 |

11. Vitrupe 2


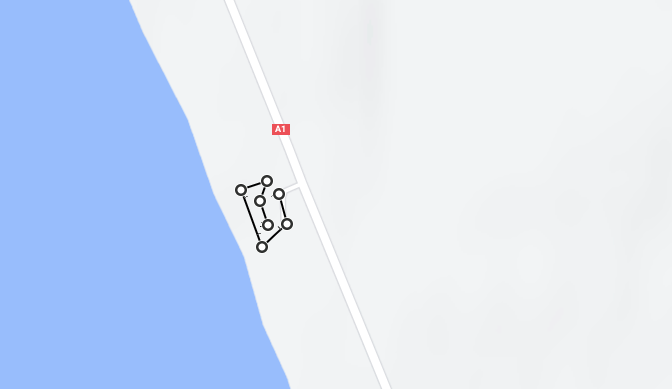


Data 2021

Data 2022 / 2023

12. Vitrupe 3


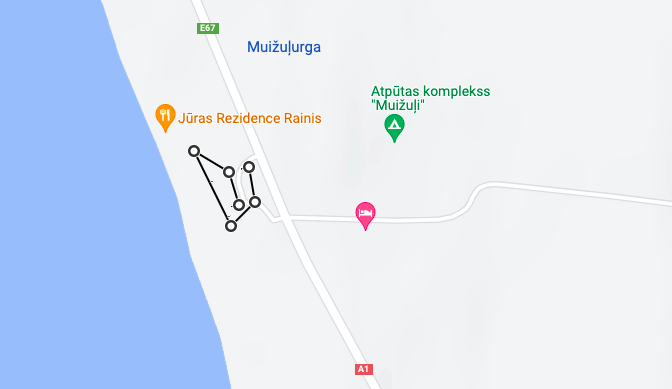


Data 2021

Data 2022 / 2023

13. Kolka


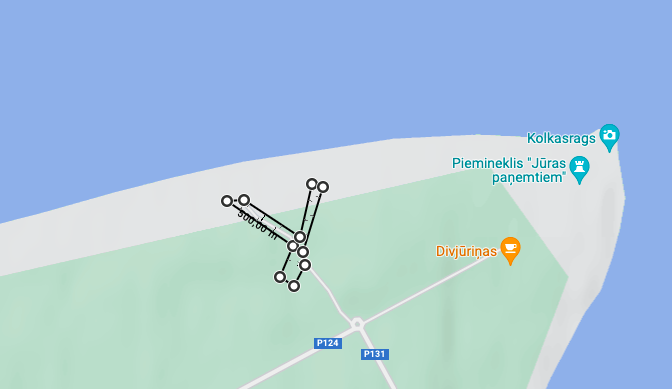


Data 2021

Data 2022 / 2023

14. Roja


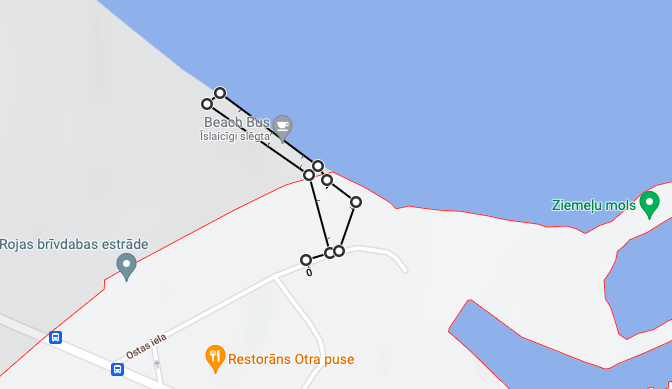


Data 2021

Data 2022 / 2023

15. Mersrags


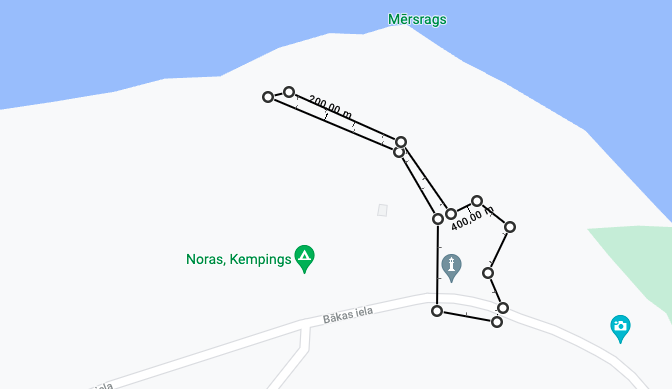


Data 2021

Data 2022 / 2023

16. Abragciems


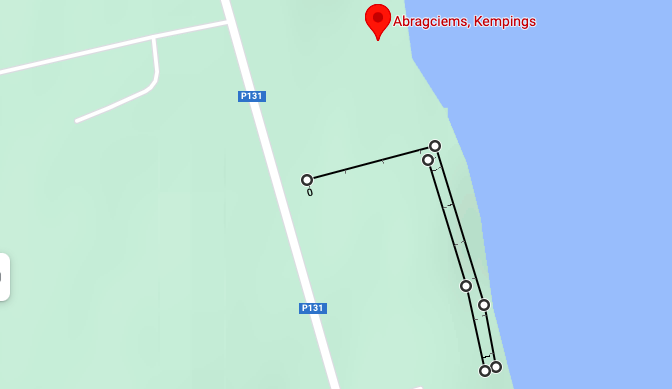


Data 2021

Data 2022 / 2023

17 Lielupe, Jūrmala


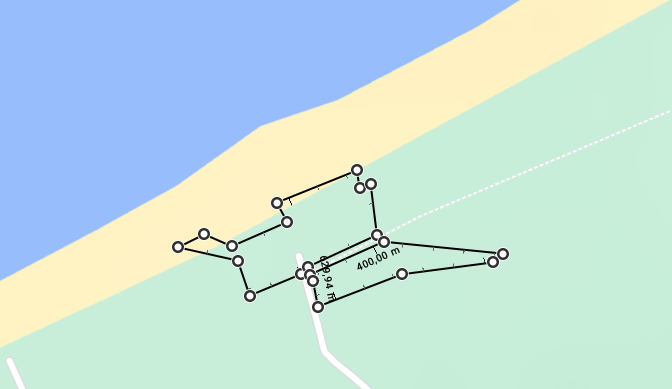


Data 2021

Data 2022 / 2023
